# Supplementary material for: Direct growth of flower-like 3D MnO2 ultrathin nanosheets on carbon paper as efficient cathode catalyst for rechargeable Li–O2 batteries
Source: Royal Society of Chemistry journal article supplement (doi:10.1039/c5ra15464b), 2015-01-01
Supplement: c5ra15464b1.pdf [file c5ra15464b1.pdf]

# Directly growth of flower-like 3D MnO<sub>2</sub> on carbon paper as efficient oxygen electrode catalyst for rechargeable Li-O<sub>2</sub> batteries†

Hong-Qiang Wang,<sup>a,c</sup> Jing Chen,<sup>a</sup> Si-Jiang Hu,<sup>c</sup> Xiao-Ping Fan,<sup>a</sup> Juan Du,<sup>d</sup> You-Guo Huang<sup>a</sup> and Qing-Yu Li<sup>a,\*</sup>

<sup>a</sup> School of Chemistry and Pharmaceutical Sciences, Guangxi Normal University, Guilin 541004, China

<sup>b</sup> Guangxi Key Laboratory of Low Carbon Energy Materials, School of Chemical and pharmaceutical Sciences, Guangxi Normal University, Guilin 541004, China

<sup>c</sup> Hubei Key Laboratory for Processing and Application of Catalytic Materials, Huanggang Normal University, Huanggang 438000, China

<sup>d</sup> Central South University School of Metallurgy and Environment, Central South University, Changsha 410083, China

\* Qing-Yu Li, E-mail: liqingyu62@126.com Fax: +86-0773-5858562

## Detailed synthesis process of MnO<sub>2</sub>/CP cathode materials

### 15 Synthesis of MnO<sub>2</sub>/CP composite

The manganese oxide was deposited on the CP substrate, which was treated by HNO<sub>3</sub> about 1h. The electrochemical deposition was carried out in a 0.1 mol/L Mn(CH<sub>3</sub>COO)<sub>2</sub> + 0.1 mol/L Na<sub>2</sub>SO<sub>4</sub> at a current density about 0.5mA/cm<sup>2</sup> for 5min. After deposition, the as-produced samples were washed with distilled water for 3 times and dried at 353 K for 4 h. The resultant composite is noted as MnO<sub>2</sub>/CP. The loading mass of the oxide is calculated from the mass difference between samples before and after electrochemical deposition.

### Characterization

Morphologies of the as-prepared samples were analyzed via Field Emission Scanning Electron Microscope (FE-SEM, FEI Quanta 200 FEG, Holland) and transmission electron microscope (TEM, FEI TECNAI G2 12, Holland). The chemical composition of the obtained products was determined using energy-dispersive X-ray spectroscopy analysis attached to the SEM (EDS). X-ray photoelectron spectroscopy (XPS) was carried out on a Physical Electronics 5400 ESCA. The Brunauer-Emmett-Teller (BET) specific surface areas were obtained from nitrogen adsorption measurements at about 77 K performed in a SA3100 instrument. Before the measurements, the samples (about 0.2 g) were evacuated at 473 K for 2h.

### Electrochemical measurement

The LOB cells were assembled for electrochemical characterization with MnO<sub>2</sub>/CP composite (diameter of 14mm) as the working electrodes, lithium foils as the reference and counter electrodes, a separator (a piece of Whatman GF/D glass microfibre filter paper and a piece of Celgard 2400) and 1M LiCF<sub>3</sub>SO<sub>3</sub> in tetra(ethylene) glycol dimethyl ether (TEGDME) as the electrolytes. All cells were assembled in a glove box system filled with argon and in glove overnight before testing. Afterwards, the cell was purged with tetraglyme-saturated oxygen for 2h. Galvanostatic discharge - charge measurements were performed on a battery test system (LAND CT2001A) between 2.0 and 4.3 V (vs. Li<sup>+</sup>/Li) at different rates at room temperature. The specific capacity was calculated based on the mass of MnO<sub>2</sub> if not specified. Electrochemical impedance spectroscopy (EIS) was performed on a IM6 (Germany) in a frequency range of 100 kHz to 10 mHz with an AC voltage amplitude of 5 mV.
